# Supplementary material
Source: Royal Society of Chemistry journal article supplement (doi:10.1039/d6fb00032k)
Supplement: d6fb00032k1.pdf [file d6fb00032k1.pdf]

**Supporting Data for the Article**

**VEGAN BURGERS FORTIFIED WITH AGRI-FOOD BY-PRODUCTS:  
NUTRITIONAL ENHANCEMENT, ENERGY CONSUMPTION AND LCA  
ASSESSMENT**

| Ingredient   | Value CTRL | Value Carrot peels | Value Turnip tops by-products | Value Broccoli by-products | Value Artichoke by-products | Value Prickly pear peels | Unit | Source               | Name of the data used in the database                                                              | Reference         |
|--------------|------------|--------------------|-------------------------------|----------------------------|-----------------------------|--------------------------|------|----------------------|----------------------------------------------------------------------------------------------------|-------------------|
| Beans        | 596,54     | 544,35             | 532,7                         | 373,02                     | 551,31                      | 421,94                   | g/kg | University of Foggia |                                                                                                    | Environdec (2024) |
| Carrot       | 143,8      | 0                  | 128,42                        | 89,93                      | 132,91                      | 101,72                   | g/kg | University of Foggia | Carrot                                                                                             | CONCITO (2021)    |
| Onion        | 66,58      | 60,75              | 59,45                         | 41,63                      | 61,53                       | 47,09                    | g/kg | University of Foggia | Onion                                                                                              | CONCITO (2021)    |
| Parsley      | 2,4        | 2,19               | 2,14                          | 1,5                        | 2,22                        | 1,7                      | g/kg | University of Foggia | Parsley                                                                                            | CONCITO (2021)    |
| Salt         | 9,59       | 8,75               | 8,56                          | 6                          | 8,86                        | 14,66                    | g/kg | University of Foggia | Salt, table                                                                                        | CONCITO (2021)    |
| Oil          | 23,97      | 21,87              | 21,4                          | 14,99                      | 22,15                       | 16,95                    | g/kg | University of Foggia |                                                                                                    | Environdec (2023) |
| Water        | 0          | 97,2               | 71,34                         | 249,79                     | 41,35                       | 126,58                   | g/kg | University of Foggia | Tap water {Europe without Switzerland}   tap water production, conventional treatment   Cut-off, S | Ecoinvent (2024)  |
| By-product   | 0          | 121,51             | 35,67                         | 124,9                      | 34,46                       | 158,23                   | g/kg | University of Foggia | Electricity, medium voltage {IT}   market for   Cut-off, S                                         | Ecoinvent (2024)  |
| Potato flake | 157,12     | 143,38             | 140,31                        | 98,25                      | 145,21                      | 111,14                   | g/kg | University of Foggia | Potato                                                                                             | CONCITO (2021)    |

**Table S1.** The table presents the inventory data and corresponding data sources for each ingredient used in the preparation of different vegan burger formulations, both with and without by-products. Values are expressed in grams per functional unit (1 kg of vegan burgers).

**Table S2: Sensory evaluation form**

**Raw - scale 1-9**

| Color | Odor | Appearance | Consistency | Global quality |
|-------|------|------------|-------------|----------------|
|       |      |            |             |                |

**Cooked - scale 1-9**

| Color | Odor | Appearance | Consistency | Chewiness | Sandiness | Taste | Global quality |
|-------|------|------------|-------------|-----------|-----------|-------|----------------|
|       |      |            |             |           |           |       |                |

| Attribute      | Definition                                                                                |
|----------------|-------------------------------------------------------------------------------------------|
| Color          | Intensity and uniformity of the typical color.                                            |
| Odor           | Intensity of the characteristic aroma of the ingredients and absence of off-odors.        |
| Appearance     | Visual evaluation of the surface, presence of visible fibers/pieces, and shape integrity. |
| Consistency    | Resistance and structural integrity perceived when cutting the sample with a knife.       |
| Chewiness      | Effort required to masticate the sample before swallowing.                                |
| Sandness       | Perception of small fiber particles during chewing.                                       |
| Taste          | Perception of balanced flavor.                                                            |
| Global Quality | Overall pleasantness and balance of all perceived sensory attributes.                     |

| DESCRIPTION RAW PARAMETERS |                                                                    |                                                                        |                                                                   |                                                                         |                                                                     |
|----------------------------|--------------------------------------------------------------------|------------------------------------------------------------------------|-------------------------------------------------------------------|-------------------------------------------------------------------------|---------------------------------------------------------------------|
| <i>Score</i>               | <i>COLOR</i>                                                       | <i>ODOR</i>                                                            | <i>APPEARANCE</i>                                                 | <i>CONSISTENCY</i>                                                      | <i>GLOBAL QUALITY</i>                                               |
| 1-2                        | Extremely faded, uneven, or showing severe oxidation.              | Odorless or entirely overwhelmed by strong off-odors (rancid, acidic). | Collapsed shape, damaged surface, or invisible fibers.            | Extremely soft/mushy or excessively hard/leathery when cut.             | Defective product; severe failures across almost all attributes     |
| 3-4                        | Weak color intensity with noticeable irregularities.               | Very weak aroma; ingredients are difficult to identify.                | Irregular surface and poorly defined shape.                       | Weak structure; lacks the expected firmness.                            | Mediocre quality; does not meet the standard profile.               |
| 5                          | Sufficient intensity and acceptable uniformity.                    | Clear perception of ingredients; absence of off-odors.                 | Intact shape with sufficient visibility of fibers/pieces.         | Adequate resistance and structural integrity.                           | Meets minimum quality and balance requirements.                     |
| 6-7                        | Vibrant, bright, and well-distributed typical color.               | Intense, fresh, and frank fragrance of the ingredients.                | Attractive appearance; smooth surface and well-structured pieces. | Compact and elastic structure; provides proper resistance.              | Good overall quality; harmonious sensory profile.                   |
| 8-9                        | Ideal color: perfect brightness and absolute chromatic uniformity. | Excellent olfactory profile: maximum purity and aromatic complexity.   | Perfect appearance: ideal shape integrity and flawless surface.   | Optimal consistency: perfect balance between resistance and plasticity. | Excellent quality: absolute balance and absence of sensory defects. |

| DESCRIPTION COOKED PARAMETERS |                                                                    |                                                                        |                                                                   |                                                                         |                                                                      |                                                                   |                                                                      |                                                                     |
|-------------------------------|--------------------------------------------------------------------|------------------------------------------------------------------------|-------------------------------------------------------------------|-------------------------------------------------------------------------|----------------------------------------------------------------------|-------------------------------------------------------------------|----------------------------------------------------------------------|---------------------------------------------------------------------|
| <i>Score</i>                  | <i>COLOR</i>                                                       | <i>ODOR</i>                                                            | <i>APPEARANCE</i>                                                 | <i>CONSISTENCY</i>                                                      | <i>CHEWINESS</i>                                                     | <i>SANDINESS</i>                                                  | <i>TASTE</i>                                                         | <i>GLOBAL QUALITY</i>                                               |
| 1-2                           | Extremely faded, uneven, or showing severe oxidation.              | Odorless or entirely overwhelmed by strong off-odors (rancid, acidic). | Collapsed shape, damaged surface, or invisible fibers.            | Extremely soft/mushy or excessively hard/leathery when cut.             | Extremely rubbery (excessive effort) or completely disintegrates.    | Massive presence of coarse, hard, or bothersome particles.        | Tasteless, excessively salty/bitter, or with chemical off-tastes.    | Defective product; severe failures across almost all attributes     |
| 3-4                           | Weak color intensity with noticeable irregularities.               | Very weak aroma; ingredients are difficult to identify.                | Irregular surface and poorly defined shape.                       | Weak structure; lacks the expected firmness.                            | High effort required to form a bolus or lacks structure.             | Evident perception of sandy or fibrous particles.                 | Weak flavor or poorly balanced ingredients.                          | Mediocre quality; does not meet the standard profile.               |
| 5                             | Sufficient intensity and acceptable uniformity.                    | Clear perception of ingredients; absence of off-odors.                 | Intact shape with sufficient visibility of fibers/pieces.         | Adequate resistance and structural integrity.                           | Typical effort required for the product type.                        | Fine grain; acceptable perception of particles.                   | Balanced flavor typical of the ingredients.                          | Meets minimum quality and balance requirements.                     |
| 6-7                           | Vibrant, bright, and well-distributed typical color.               | Intense, fresh, and frank fragrance of the ingredients.                | Attractive appearance; smooth surface and well-structured pieces. | Compact and elastic structure; provides proper resistance.              | Easy to chew while maintaining a pleasant bite.                      | Very fine texture; particles are almost imperceptible.            | Full, harmonious, and persistent taste.                              | Good overall quality; harmonious sensory profile.                   |
| 8-9                           | Ideal color: perfect brightness and absolute chromatic uniformity. | Excellent olfactory profile: maximum purity and aromatic complexity.   | Perfect appearance: ideal shape integrity and flawless surface.   | Optimal consistency: perfect balance between resistance and plasticity. | Perfect chewiness: disintegrates exactly at the point of swallowing. | Perfect texture: total absence of any sandy or grainy perception. | Exceptional taste: perfect balance and maximum expression of flavor. | Excellent quality: absolute balance and absence of sensory defects. |

**Panelist code:**

**Gender and age:**

**Date:**

## References

CONCITO, 2021. The Big Climate Database, v 1.2. <https://denstoreklimadatabase.dk/en>

Ecoinvent, 2024. Ecoinvent database version 3.

Environdec, 2023. “Environmental Product Declaration: Extra Virgin Olive Oil”

<https://api.environdec.com/api/v1/EPDLibrary/Files/d7e05ffc-fb2d-41ca-265c-08db259f9365/Data>

Environdec, 2024. Environmental Product Declaration: Borlotti beans.

<https://api.environdec.com/api/v1/EPDLibrary/Files/0ef35481-8e12-415a-a17f-08dd7e7fd370/Data>
